# Supplementary material for: A time-resolved study on the interaction of oppositely charged bicelles – implications on the charged lipid exchange kinetics
Source: Royal Society of Chemistry journal article supplement (doi:10.1039/c4sm02886d), 2015-01-01
Supplement: c4sm02886d1.pdf [file c4sm02886d1.pdf]

## Electronic Supplementary Information (ESI)

A Time-Resolved Study on the Interaction of Oppositely Charged Bicelles – Implications on the Charged Lipid Exchange Kinetics

Po-Wei Yang,<sup>1</sup> Tsang-Lang Lin,<sup>1,\*</sup> Yuan Hu,<sup>1</sup> and U-Ser Jeng<sup>2</sup>

<sup>1</sup>Department of Engineering and System Science, National Tsing Hua University

<sup>2</sup>National Synchrotron Radiation Research Center

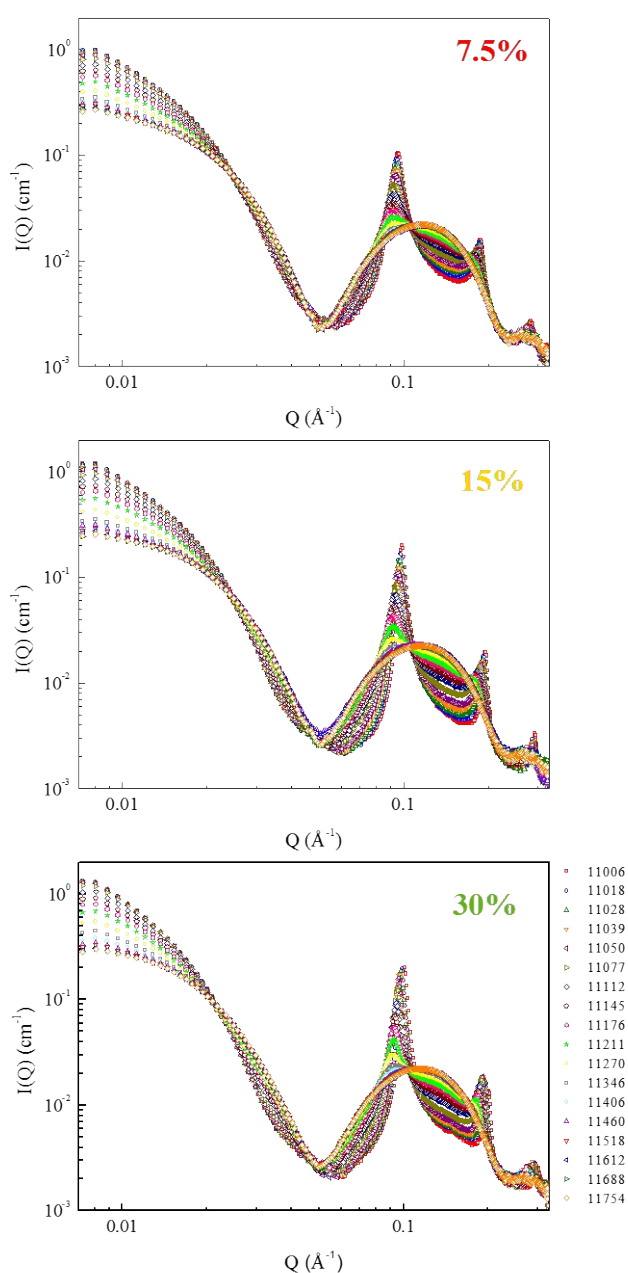

Figure S1 Time resolved small-angle X-ray scattering of mixing oppositely charged bicelles at different membrane charge density.

Table S1 Fitting parameter of 7.5% case.

| 7.5% Time | Core radius | Polydispersity of core radius | Thickness (Å) |      |      | Scattering length density ( $\times 10^{-6} \text{ \AA}^{-2}$ ) |      |      |         | Average stacked number | Water gap (Å) | d-GSD | C1   |
|-----------|-------------|-------------------------------|---------------|------|------|-----------------------------------------------------------------|------|------|---------|------------------------|---------------|-------|------|
|           |             |                               | Core          | Rim  | Face | Core                                                            | Face | Rim  | Solvent |                        |               |       |      |
| 006       | 88.7        | 0.21                          | 22.4          | 17.7 | 17.7 | 7.40                                                            | 11.5 | 9.47 | 9.40    | 14.5                   | 8.95          | 0.084 | 0.18 |
| 018       | 90.3        | 0.21                          | 22.4          | 17.7 | 17.7 | 7.40                                                            | 11.5 | 9.48 | 9.40    | 13.2                   | 9.48          | 0.089 | 0.23 |
| 028       | 94.7        | 0.21                          | 22.3          | 17.9 | 17.9 | 7.40                                                            | 11.5 | 9.41 | 9.40    | 11.4                   | 9.69          | 0.092 | 0.31 |
| 039       | 94.9        | 0.21                          | 22.3          | 17.9 | 17.9 | 7.40                                                            | 11.5 | 9.43 | 9.40    | 10.3                   | 9.98          | 0.095 | 0.38 |
| 050       | 95.5        | 0.20                          | 22.4          | 17.9 | 17.9 | 7.40                                                            | 11.5 | 9.45 | 9.40    | 9.3                    | 10.2          | 0.096 | 0.48 |
| 077       | 96.8        | 0.21                          | 22.3          | 17.9 | 17.9 | 7.40                                                            | 11.5 | 9.44 | 9.40    | 8.2                    | 10.9          | 0.103 | 0.71 |
| 112       | 98.0        | 0.21                          | 22.4          | 17.9 | 17.9 | 7.40                                                            | 11.5 | 9.43 | 9.40    | 7.1                    | 11.2          | 0.107 | 1.07 |
| 145       | 96.2        | 0.22                          | 22.5          | 18.0 | 18.0 | 7.40                                                            | 11.5 | 9.45 | 9.40    | 6.3                    | 11.7          | 0.113 | 1.50 |
| 176       | 95.4        | 0.23                          | 22.5          | 18.0 | 18.0 | 7.40                                                            | 11.5 | 9.45 | 9.40    | 5.6                    | 12.0          | 0.118 | 2.07 |
| 211       | 85.8        | 0.27                          | 22.8          | 17.7 | 17.7 | 7.40                                                            | 11.5 | 9.61 | 9.40    | 4.7                    | 12.8          | 0.117 | 2.96 |

Table S2 Fitting parameter of 15% case.

| 15% Time | Core radius | Polydispersity of core radius | Thickness (Å) |      |      | Scattering length density ( $\times 10^{-6} \text{ \AA}^{-2}$ ) |      |      |         | Average stacked number | Water gap (Å) | d-GSD | C1   |
|----------|-------------|-------------------------------|---------------|------|------|-----------------------------------------------------------------|------|------|---------|------------------------|---------------|-------|------|
|          |             |                               | Core          | Rim  | Face | Core                                                            | Face | Rim  | Solvent |                        |               |       |      |
| 006      | 78.9        | 0.24                          | 23.2          | 17.2 | 17.2 | 7.40                                                            | 11.5 | 9.77 | 9.40    | 30.3                   | 6.84          | 0.059 | 0.08 |
| 018      | 81.6        | 0.23                          | 23.1          | 17.4 | 17.4 | 7.40                                                            | 11.5 | 9.72 | 9.40    | 23.7                   | 7.44          | 0.068 | 0.07 |
| 028      | 89.9        | 0.21                          | 22.7          | 17.8 | 17.8 | 7.40                                                            | 11.5 | 9.53 | 9.40    | 19.3                   | 7.59          | 0.076 | 0.08 |
| 039      | 93.1        | 0.20                          | 22.6          | 17.8 | 17.8 | 7.40                                                            | 11.5 | 9.48 | 9.40    | 16.5                   | 8.16          | 0.082 | 0.11 |
| 050      | 97.7        | 0.19                          | 22.4          | 18.0 | 18.0 | 7.40                                                            | 11.5 | 9.40 | 9.40    | 14.5                   | 8.34          | 0.086 | 0.16 |
| 077      | 99.5        | 0.19                          | 22.4          | 18.0 | 18.0 | 7.40                                                            | 11.5 | 9.40 | 9.40    | 12.2                   | 9.29          | 0.093 | 0.32 |
| 112      | 100.9       | 0.19                          | 22.5          | 18.0 | 18.0 | 7.40                                                            | 11.5 | 9.40 | 9.40    | 10.4                   | 10.0          | 0.097 | 0.57 |
| 145      | 102.3       | 0.19                          | 22.5          | 18.1 | 18.1 | 7.40                                                            | 11.5 | 9.40 | 9.40    | 8.3                    | 10.5          | 0.097 | 0.93 |
| 176      | 104.9       | 0.19                          | 22.4          | 18.2 | 18.2 | 7.40                                                            | 11.5 | 9.36 | 9.40    | 6.4                    | 11.0          | 0.092 | 1.44 |
| 211      | 101.9       | 0.20                          | 22.5          | 18.1 | 18.1 | 7.40                                                            | 11.5 | 9.37 | 9.40    | 5.4                    | 11.5          | 0.098 | 2.03 |
| 270      | 97.2        | 0.23                          | 22.5          | 18.2 | 18.2 | 7.40                                                            | 11.5 | 9.41 | 9.40    | 4.5                    | 12.1          | 0.102 | 3.92 |
| 346      | 94.6        | 0.25                          | 22.5          | 18.2 | 18.2 | 7.40                                                            | 11.5 | 9.41 | 9.40    | 3.5                    | 12.7          | 0.095 | 8.65 |

Table S3 Fitting parameter of 30% case.

| 30% Time | Core radius | Polydispersity of core radius | Thickness (Å) |      |      | Scattering length density ( $\times 10^{-6} \text{ \AA}^{-2}$ ) |      |      |         | Average stacked number | Water gap (Å) | d-GSD | C1   |
|----------|-------------|-------------------------------|---------------|------|------|-----------------------------------------------------------------|------|------|---------|------------------------|---------------|-------|------|
|          |             |                               | Core          | Rim  | Face | Core                                                            | Face | Rim  | Solvent |                        |               |       |      |
| 006      | 107.1       | 0.21                          | 22.5          | 17.6 | 17.6 | 7.40                                                            | 11.5 | 9.37 | 9.40    | 46.9                   | 5.18          | 0.072 | 0.18 |
| 018      | 108.7       | 0.21                          | 22.6          | 17.7 | 17.7 | 7.40                                                            | 11.5 | 9.36 | 9.40    | 39.1                   | 6.13          | 0.07  | 0.14 |
| 028      | 108.2       | 0.21                          | 22.6          | 17.8 | 17.8 | 7.40                                                            | 11.5 | 9.42 | 9.40    | 32.4                   | 6.76          | 0.068 | 0.18 |
| 039      | 108.3       | 0.21                          | 22.7          | 17.8 | 17.8 | 7.40                                                            | 11.5 | 9.45 | 9.40    | 28.2                   | 7.24          | 0.067 | 0.23 |
| 050      | 108.5       | 0.21                          | 22.7          | 17.9 | 17.9 | 7.40                                                            | 11.5 | 9.48 | 9.40    | 24.3                   | 7.65          | 0.066 | 0.28 |
| 077      | 111.4       | 0.21                          | 22.7          | 17.9 | 17.9 | 7.40                                                            | 11.5 | 9.49 | 9.40    | 19.4                   | 8.52          | 0.069 | 0.45 |
| 112      | 113.8       | 0.21                          | 22.6          | 18.0 | 18.0 | 7.40                                                            | 11.5 | 9.48 | 9.40    | 14.9                   | 9.24          | 0.075 | 0.74 |
| 145      | 114.2       | 0.22                          | 22.6          | 18.0 | 18.0 | 7.40                                                            | 11.5 | 9.48 | 9.40    | 12.6                   | 9.82          | 0.081 | 1.12 |
| 176      | 115.3       | 0.22                          | 22.5          | 18.1 | 18.1 | 7.40                                                            | 11.5 | 9.44 | 9.40    | 10.5                   | 10.3          | 0.084 | 1.62 |
| 211      | 113.0       | 0.23                          | 22.6          | 18.0 | 18.0 | 7.40                                                            | 11.5 | 9.48 | 9.40    | 8.4                    | 10.8          | 0.084 | 2.38 |
| 270      | 109.3       | 0.24                          | 22.7          | 18.0 | 18.0 | 7.40                                                            | 11.5 | 9.49 | 9.40    | 6.2                    | 11.3          | 0.084 | 4.13 |
| 346      | 92.81       | 0.27                          | 23.2          | 17.4 | 17.4 | 7.40                                                            | 11.5 | 9.78 | 9.40    | 4.7                    | 12.7          | 0.106 | 6.27 |
